# Supplementary material
Source: PubMed Central journal article supplement (PMC4527085)
Supplement: NIHMS704919-supplement.pdf [file NIHMS704919-supplement.pdf]

## **An Overview of Translationally Informed Treatments for Posttraumatic Stress Disorder: Animal Models of Pavlovian Fear Conditioning to Human Clinical Trials**

### ***Supplemental Information***

#### **Additional Background Material**

#### **Pavlovian Fear Conditioning and Extinction as a Model of Fear-Related Phenotypes of PTSD**

Pavlovian fear conditioning is a form of associative learning that has been used to probe fear-related phenotypes of PTSD. In this behavioral paradigm, a neutral stimulus is presented repeatedly in tandem with an aversive stimulus (unconditioned stimulus, "US"). After repeated co-presentations, the subject learns the neutral - now conditioned ("CS") - stimulus predicts an incoming US. Consequently, the subject will exhibit fear-related behavior in response to the CS. Procedurally, Pavlovian fear conditioning is likely very similar to acquisition of traumatic memory, where individuals fearfully react (unconditioned response) to trauma (US), concurrently forming associations between the environmental context (CS) and other sensory stimuli and trauma.

Conversely, extinction involves repeated presentations of the CS so that the subject learns that the CS no longer signals an incoming US and inhibits fear-related behaviors. Extinction of conditioned fear may reflect normative fear diminishment after trauma. It is plausible that at-risk individuals exhibit poor extinction of fear responses to trauma-related cues, promoting development of PTSD. In support of this hypothesis, data suggest that individuals with PTSD exhibit impaired recall of extinction when fear conditioned with discrete cues (1-3). Extinction of cued fear also closely models exposure therapy - the recommended first-line treatment for PTSD. Procedurally, extinction is nearly identical to exposure therapy, exhibiting good face validity. During extinction, the feared object, context, or memory is repeatedly presented or

recalled in a safe environment until fear is inhibited. Moreover, extinction exhibits predictive validity, as drugs that facilitate extinction in animal models, such as D-cycloserine, have shown efficacy in some clinical studies, reducing PTSD symptoms when administered in combination with exposure therapy.

Critically, fear extinction is context-dependent, where the extinguished fear response is only observed in the context where extinction training took place and re-emerges in novel contexts. This phenomenon, referred to as “renewal”, can be used to test contextual processing deficits thought to contribute to an inability to modulate fear in individuals with PTSD (4). This hypothesis is supported by data demonstrating that PTSD patients are unable to effectively renew fear memories in a danger context compared to trauma controls (3).

While evidence suggests that individuals with PTSD exhibit poor extinction, as well as deficits in contextual processing, the extant data also demonstrate that affected individuals exhibit increased generalization, where intense fear is elicited by vaguely-related trauma cues. Pavlovian fear conditioning can also be used to model generalization. Generalization is often measured in pre-clinical animal studies by assaying fear-related behavior in response to a cue (referred to as “CS-“ or generalization stimulus) similar to the CS+, but not previously associated with a US, e.g. a 2.5 kHz versus a 10 kHz auditory tone (5-7). Similar studies have been employed in humans and demonstrate that individuals with PTSD exhibit overgeneralization (8-13).

While Pavlovian fear conditioning has been used effectively to model a number of fear-related phenotypes of PTSD, a critical caveat is whether normative fear learning is reflective of a psychiatric disorder characterized by pathological fear with evident changes in underlying neurobiology. Consequently, animal models that are hypothesized to more appropriately recapitulate PTSD are being developed and tested (14, 15). For instance, single prolonged stress (2 hour restraint stress, 20 minute forced swim, and ether anesthesia) causes deficits in fear extinction, which is thought to more thoroughly instantiate PTSD-like symptoms and the

accompanying underlying pathology (16, 17). Similarly, genetic mouse models of PTSD have been developed, including the 129S1/SvImJ (S1) transgenic mouse line, which exhibit persistent impairment of fear extinction (18). Still others have modeled PTSD-like memory impairments using hippocampal corticosterone infusions and standard Pavlovian fear conditioning (19). These models support human epidemiological data, which suggest that factors external to learning events surrounding specific trauma, including interoceptive contexts, influence development of PTSD.

### **Neurobiology of Pavlovian Fear Conditioning and Extinction**

The neurobiology of Pavlovian fear acquisition is well characterized (Fig. S1A). Neuroimaging, lesion, and pharmacology studies across species suggest that information about the CS and US converge at the lateral and basolateral amygdala (LA and BLA, respectively) via afferents from the thalamus and cortex (20, 21). In this model, multiple pairings of the CS and the US induce synaptic plasticity at the level of the BLA (22). Subsequent activation of the central amygdala (CeA), via BLA input, elicits conditioned stimulus-elicited fear responses, including freezing, increased heart rate, and potentiated startle, by activating downstream brain areas like the hypothalamus, locus coeruleus, and other brainstem nuclei (23). Fear expression is dependent on prelimbic cortex (PL)-amygdala signaling, potentially via hippocampal modulation of the PL (4).

Alternatively, the neurobiology of extinction learning – where fear is diminished through the process of exposure to the fear-eliciting CS in the absence of the aversive US - is incompletely understood (Fig. S1B). Data suggests extinction learning is a new learning process that proceeds through multiple mechanisms to suppress, rather than erase, existing aversive memories (24). Dynamic changes in gephyrin mRNA and GABA<sub>A</sub> receptor binding indicate an increase in amygdala GABAergic transmission with extinction (25). *In vivo* electrophysiology studies reveal a subset of excitatory projection neurons in the BLA exhibit increased firing rates

during extinction (26). These “extinction neurons” are responsive to the CS during extinction, but not during fear conditioning (26). Furthermore, a number of studies implicate the mPFC, in particular the infralimbic cortex (IL), in extinction recall, with data suggesting that the IL inhibits CeA output, potentially via hippocampal activation of the IL (4, 27-29). IL-dependent potentiation of BLA inputs to GABAergic ITC neurons increases inhibition of the CeA during extinction, decreasing conditioned fear responses (30, 31). The mPFC is similarly implicated in renewal. Renewal is thought to depend on hippocampal-controlled gating of amygdala responses via direct projections to the amygdala and/or indirect projections via mPFC (4). Additionally, regions with an established role in fear learning are critical for fear generalization (6, 8, 32-35).

Importantly, individuals with PTSD exhibit amygdala hyperactivity and mPFC hypoactivity, consistent with neurobiological data from fear conditioning and extinction experiments conducted across animals and humans (36, 37). Specifically, changes in coupling between the amygdala and mPFC may underlie emotion dysregulation in PTSD, where reduced mPFC-driven inhibition allows amygdala hyperactivity (38). Reduced hippocampal volume has also been associated with PTSD, potentially contributing to observed contextual processing deficits (36). For more thorough review examining the neurobiological correlates of PTSD, see (36, 37).

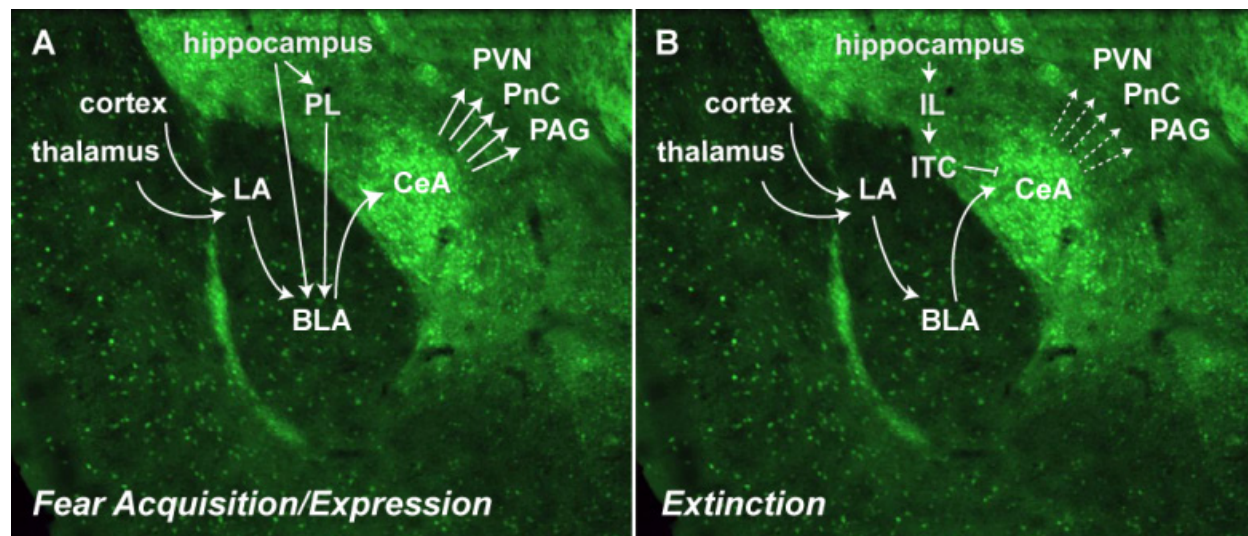

**Figure S1. Neurobiology of associative fear learning.** Expression of enhanced green-fluorescent protein (GFP) in these photomicrographs is driven by the interneuron-specific driver *Dlx5/6-Cre*. During fear conditioning, information about the conditioned stimulus (CS) and unconditioned stimulus (US) converge at the lateral and basolateral amygdala (LA and BLA, respectively) via afferent neural projections from the thalamus and cortex. Multiple co-presentations of the CS and US induce synaptic plasticity at the level of the BLA. Subsequent activation of the central amygdala (CeA), via BLA input, elicits conditioned stimulus-elicited fear responses (CR), including freezing, increased heart rate, and potentiated startle, by activating downstream brain areas like the hypothalamus, pontine reticular nucleus (PnC), periaqueductal gray (PAG), and other brainstem nuclei. Prelimbic cortex (PL)-amygdala signaling, potentially via hippocampal modulation of the PL, is critical for fear expression, and has been similarly implicated in renewal, where conditioned fear responses re-emerge outside of the extinction context. Renewal of fear is also dependent on direct projections from the hippocampus to the amygdala. B) The neurobiology of cued fear extinction is less clear. Activation of GABAergic intercalated cells by mPFC, specifically the infralimbic cortex (IL), is thought to dampen CeA output, inhibiting the expression of fear-related behaviors. Hippocampal modulation of IL is thought to drive, in part, IL-mediated inhibition of CeA.

## Supplemental References

1. Milad MR, Pitman RK, Ellis CB, Gold AL, Shin LM, Lasko NB, *et al.* (2009): Neurobiological basis of failure to recall extinction memory in posttraumatic stress disorder. *Biological psychiatry*. 66:1075-1082.
2. Milad MR, Orr SP, Lasko NB, Chang Y, Rauch SL, Pitman RK (2008): Presence and acquired origin of reduced recall for fear extinction in PTSD: results of a twin study. *Journal of psychiatric research*. 42:515-520.
3. Garfinkel SN, Abelson JL, King AP, Sripada RK, Wang X, Gaines LM, *et al.* (2014): Impaired contextual modulation of memories in PTSD: an fMRI and psychophysiological study of extinction retention and fear renewal. *The Journal of neuroscience*. 34:13435-13443.
4. Maren S, Phan KL, Liberzon I (2013): The contextual brain: implications for fear conditioning, extinction and psychopathology. *Nature reviews Neuroscience*. 14:417-428.
5. Laxmi TR, Stork O, Pape HC (2003): Generalisation of conditioned fear and its behavioural expression in mice. *Behavioural brain research*. 145:89-98.
6. Bergado-Acosta JR, Sangha S, Narayanan RT, Obata K, Pape HC, Stork O (2008): Critical role of the 65-kDa isoform of glutamic acid decarboxylase in consolidation and generalization of Pavlovian fear memory. *Learn Mem*. 15:163-171.
7. Armony JL, Servan-Schreiber D, Romanski LM, Cohen JD, LeDoux JE (1997): Stimulus generalization of fear responses: effects of auditory cortex lesions in a computational model and in rats. *Cereb Cortex*. 7:157-165.
8. Dunsmoor JE, Prince SE, Murty VP, Kragel PA, LaBar KS (2011): Neurobehavioral mechanisms of human fear generalization. *NeuroImage*. 55:1878-1888.
9. Vervliet B, Kindt M, Vansteenwegen D, Hermans D (2010): Fear generalization in humans: impact of verbal instructions. *Behaviour research and therapy*. 48:38-43.
10. Lissek S, Biggs AL, Rabin SJ, Cornwell BR, Alvarez RP, Pine DS, *et al.* (2008): Generalization of conditioned fear-potentiated startle in humans: experimental validation and clinical relevance. *Behaviour research and therapy*. 46:678-687.
11. Norrholm SD, Jovanovic T, Briscione MA, Anderson KM, Kwon CK, Warren VT, *et al.* (2014): Generalization of fear-potentiated startle in the presence of auditory cues: a parametric analysis. *Frontiers in behavioral neuroscience*. 8:361.
12. Peri T, Ben-Shakhar G, Orr SP, Shalev AY (2000): Psychophysiologic assessment of aversive conditioning in posttraumatic stress disorder. *Biological psychiatry*. 47:512-519.
13. Grillon C, Morgan CA, 3rd (1999): Fear-potentiated startle conditioning to explicit and contextual cues in Gulf War veterans with posttraumatic stress disorder. *Journal of abnormal psychology*. 108:134-142.
14. Cohen H, Zohar J (2004): An animal model of posttraumatic stress disorder: the use of cut-off behavioral criteria. *Annals of the New York Academy of Sciences*. 1032:167-178.
15. Bush DE, Sotres-Bayon F, LeDoux JE (2007): Individual differences in fear: isolating fear reactivity and fear recovery phenotypes. *Journal of traumatic stress*. 20:413-422.
16. Yamada D, Wada K, Sekiguchi M (2011): Facilitating actions of an AMPA receptor potentiator upon extinction of contextually conditioned fear response in stressed mice. *Neuroscience letters*. 488:242-246.
17. Yamamoto S, Morinobu S, Fuchikami M, Kurata A, Kozuru T, Yamawaki S (2008): Effects of single prolonged stress and D-cycloserine on contextual fear extinction and hippocampal NMDA receptor expression in a rat model of PTSD. *Neuropsychopharmacology*. 33:2108-2116.

18. Whittle N, Schmuckermair C, Gunduz Cinar O, Hauschild M, Ferraguti F, Holmes A, *et al.* (2013): Deep brain stimulation, histone deacetylase inhibitors and glutamatergic drugs rescue resistance to fear extinction in a genetic mouse model. *Neuropharmacology*. 64:414-423.
19. Kaouane N, Porte Y, Vallee M, Brayda-Bruno L, Mons N, Calandreau L, *et al.* (2012): Glucocorticoids can induce PTSD-like memory impairments in mice. *Science*. 335:1510-1513.
20. LaBar KS, Gatenby JC, Gore JC, LeDoux JE, Phelps EA (1998): Human amygdala activation during conditioned fear acquisition and extinction: a mixed-trial fMRI study. *Neuron*. 20:937-945.
21. Rogan MT, LeDoux JE (1995): LTP is accompanied by commensurate enhancement of auditory-evoked responses in a fear conditioning circuit. *Neuron*. 15:127-136.
22. Rogan MT, Staubli UV, LeDoux JE (1997): Fear conditioning induces associative long-term potentiation in the amygdala. *Nature*. 390:604-607.
23. Davis M (1997): Neurobiology of fear responses: the role of the amygdala. *The Journal of neuropsychiatry and clinical neurosciences*. 9:382-402.
24. Myers KM, Davis M (2007): Mechanisms of fear extinction. *Molecular psychiatry*. 12:120-150.
25. Chhatwal JP, Myers KM, Ressler KJ, Davis M (2005): Regulation of gephyrin and GABAA receptor binding within the amygdala after fear acquisition and extinction. *The Journal of neuroscience* 25:502-506.
26. Herry C, Ciocchi S, Senn V, Demmou L, Muller C, Luthi A (2008): Switching on and off fear by distinct neuronal circuits. *Nature*. 454:600-606.
27. Milad MR, Quirk GJ (2002): Neurons in medial prefrontal cortex signal memory for fear extinction. *Nature*. 420:70-74.
28. Quirk GJ, Likhtik E, Pelletier JG, Pare D (2003): Stimulation of medial prefrontal cortex decreases the responsiveness of central amygdala output neurons. *The Journal of neuroscience*. 23:8800-8807.
29. Sierra-Mercado D, Padilla-Coreano N, Quirk GJ (2011): Dissociable roles of prelimbic and infralimbic cortices, ventral hippocampus, and basolateral amygdala in the expression and extinction of conditioned fear. *Neuropsychopharmacology : official publication of the American College of Neuropsychopharmacology*. 36:529-538.
30. Likhtik E, Popa D, Aperia-Schoute J, Fidacaro GA, Pare D (2008): Amygdala intercalated neurons are required for expression of fear extinction. *Nature*. 454:642-645.
31. Amano T, Unal CT, Pare D (2010): Synaptic correlates of fear extinction in the amygdala. *Nature neuroscience*. 13:489-494.
32. Genud-Gabai R, Klavir O, Paz R (2013): Safety signals in the primate amygdala. *The Journal of neuroscience* 33:17986-17994.
33. Shaban H, Humeau Y, Herry C, Cassasus G, Shigemoto R, Ciocchi S, *et al.* (2006): Generalization of amygdala LTP and conditioned fear in the absence of presynaptic inhibition. *Nature neuroscience*. 9:1028-1035.
34. Dunsmoor JE, LaBar KS (2012): Brain activity associated with omission of an aversive event reveals the effects of fear learning and generalization. *Neurobiology of learning and memory*. 97:301-312.
35. Duvarci S, Bauer EP, Pare D (2009): The bed nucleus of the stria terminalis mediates inter-individual variations in anxiety and fear. *The Journal of neuroscience*. 29:10357-10361.
36. Shin LM, Rauch SL, Pitman RK (2006): Amygdala, medial prefrontal cortex, and hippocampal function in PTSD. *Annals of the New York Academy of Sciences*. 1071:67-79.

37. Koenigs M, Grafman J (2009): Posttraumatic stress disorder: the role of medial prefrontal cortex and amygdala. *The Neuroscientist : a review journal bringing neurobiology, neurology and psychiatry*. 15:540-548.
38. St Jacques PL, Botzung A, Miles A, Rubin DC (2011): Functional neuroimaging of emotionally intense autobiographical memories in post-traumatic stress disorder. *Journal of psychiatric research*. 45:630-637.
